# Supplementary material for: Simulating domain architecture evolution
Source: PubMed Central journal article supplement (PMC9236583; doi:10.1093/bioinformatics/btac242), 2022-06-27
Supplement: btac242_supplementary_data.pdf [file btac242_supplementary_data.pdf]

## S Supplementary Information

| Primates                   | Fish                          | Drosophila                      | Cnidaria                      |
|----------------------------|-------------------------------|---------------------------------|-------------------------------|
| <i>Gorilla gorilla</i>     | <i>Astyanax mexicanus</i>     | <i>Drosophila ananassae</i>     | <i>Acropora digitifera</i>    |
| <i>Mus musculus</i>        | <i>Gasterosteus aculeatus</i> | <i>Drosophila melanogaster</i>  | <i>Hydra vulgaris</i>         |
| <i>Pongo abelii</i>        | <i>Oryzias latipes</i>        | <i>Drosophila pseudoobscura</i> | <i>Nematostella vectensis</i> |
| <i>Homo sapiens</i>        | <i>Tetraodon nigroviridis</i> | <i>Drosophila suzukii</i>       | <i>Thelohanellus kitauei</i>  |
| <i>Nomascus leucogenys</i> | <i>Danio rerio</i>            | <i>Drosophila yakuba</i>        |                               |
| <i>Macaca mulatta</i>      | <i>Lepisosteus oculatus</i>   | <i>Drosophila erecta</i>        |                               |
| <i>Pan troglodytes</i>     | <i>Poecilia formosa</i>       | <i>Drosophila mojavensis</i>    |                               |
|                            | <i>Xiphophorus maculatus</i>  | <i>Drosophila sechellia</i>     |                               |
|                            | <i>Gadus morhua</i>           | <i>Drosophila virilis</i>       |                               |
|                            | <i>Oreochromis niloticus</i>  | <i>Drosophila grimshawi</i>     |                               |
|                            | <i>Takifugu rubripes</i>      | <i>Drosophila persimilis</i>    |                               |
|                            |                               | <i>Drosophila simulans</i>      |                               |
|                            |                               | <i>Drosophila willistoni</i>    |                               |

**Table S1.** Genomes used in this study

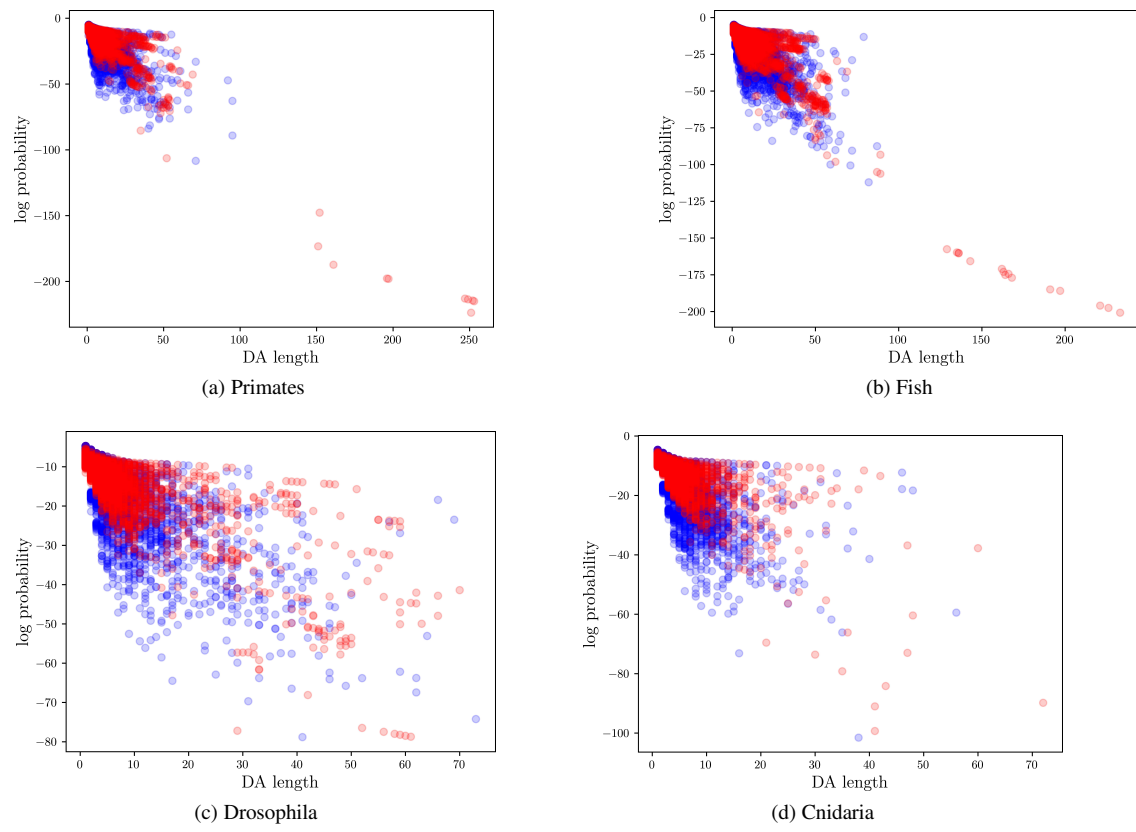

Fig. S1: Dependence of domain architecture probability on domain architecture length in genuine (red) and simulated (blue,  $T = 3.2M$ ) domain architectures.

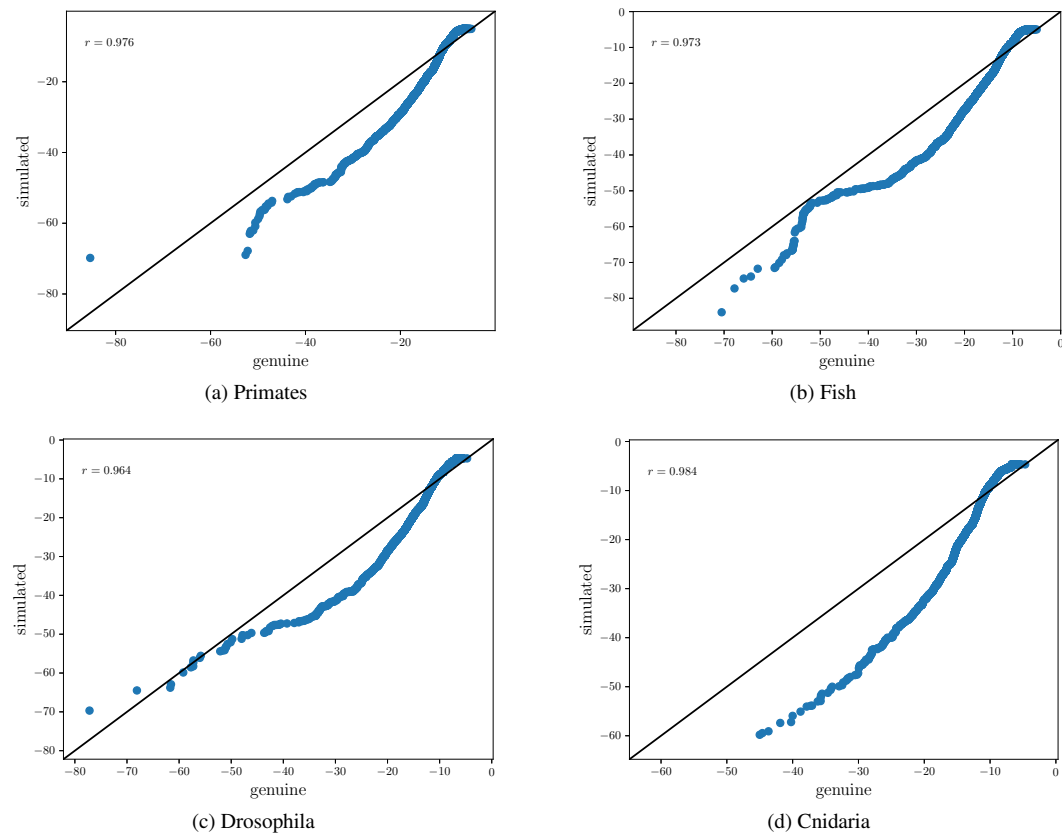

Fig. S2: Q-Q plot of genuine and simulated ( $T = 3.2M$ ) domain architecture log likelihood, calculated using the first order approximation (Eqn 2) with bigram frequencies in the genuine data. Length outliers (the longest 1% of domain architectures) in each set are not shown.

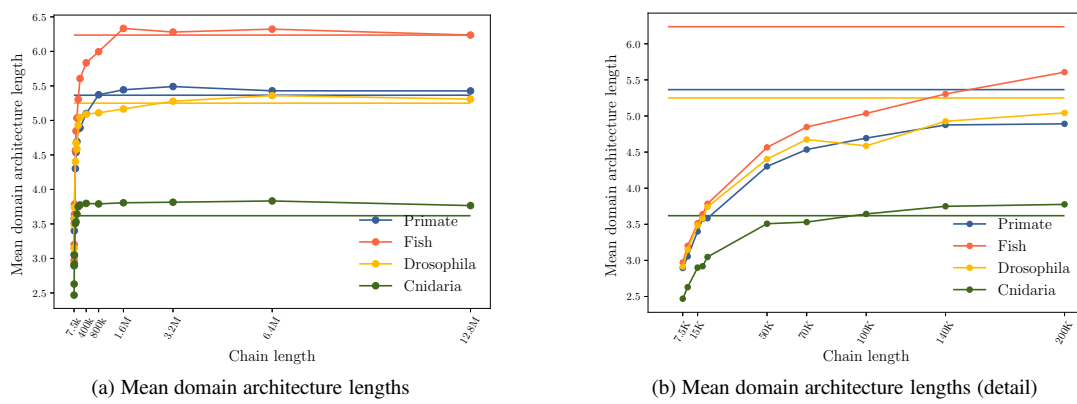

Fig. S3: Final domain architecture length as a function of chain length, averaged over all replicates. Horizontal lines represent mean length of genuine domain architectures.
